# Supplementary material for: Lotus Root Type Nickel Oxide-Carbon Nanofibers: A Hybrid Supercapacitor Electrode Material
Source: MDPI journal article supplement (doi:10.3390/app14072977), 2024-04-01
Supplement: s1 [file s1]

## Supporting Information

# Lotus Root Type Nickel Oxide-Carbon Nanofibers: A Hybrid Supercapacitor Electrode Material

Juhyeong Kim <sup>1,†</sup>, Junho Lee <sup>1,†</sup>, Hwajeong Ryu <sup>1</sup>, Yoon Hwa <sup>2</sup>, Aneel Pervez <sup>1</sup>, Taeyong Choi <sup>1</sup>,  
Suyong Nam <sup>3</sup> and Yoonkook Son <sup>1,\*</sup>

<sup>1</sup> Department of Electrical Engineering, Chosun University, 309, Pilmun-daero, Dong-gu, Gwangju 61452, Republic of Korea; juhyeong@chosun.kr (J.K.); kodume@hanmail.net (J.L.); ghkwjdfb7620@chosun.kr (H.R.); aneelpervez@chosun.ac.kr (A.P.); o304@chosun.ac.kr (T.C.)

<sup>2</sup> School of Electrical, Computer and Energy Engineering, Arizona State University, Tempe, AZ 85287, USA; yoon.hwa@asu.edu

<sup>3</sup> Department of Nanotechnology Engineering, Pukyong National University, 45, Yongso-ro, Nam-gu, Busan 48547, Republic of Korea; suynam@pknu.ac.kr

\* Correspondence: y\_son@chosun.ac.kr

† These authors contributed equally to this work.

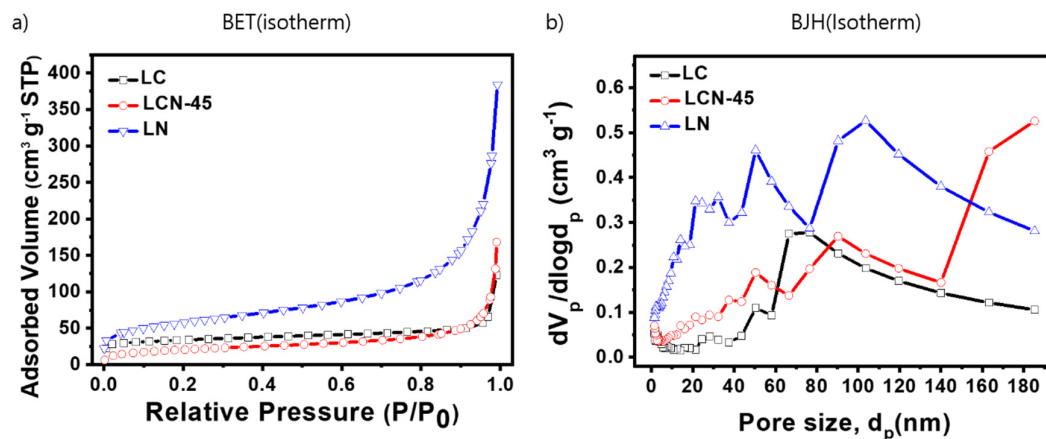

Figure S1. (a) Adsorption isotherms and (b) Pore size distribution graphs of LC, LCN-45, and LN.

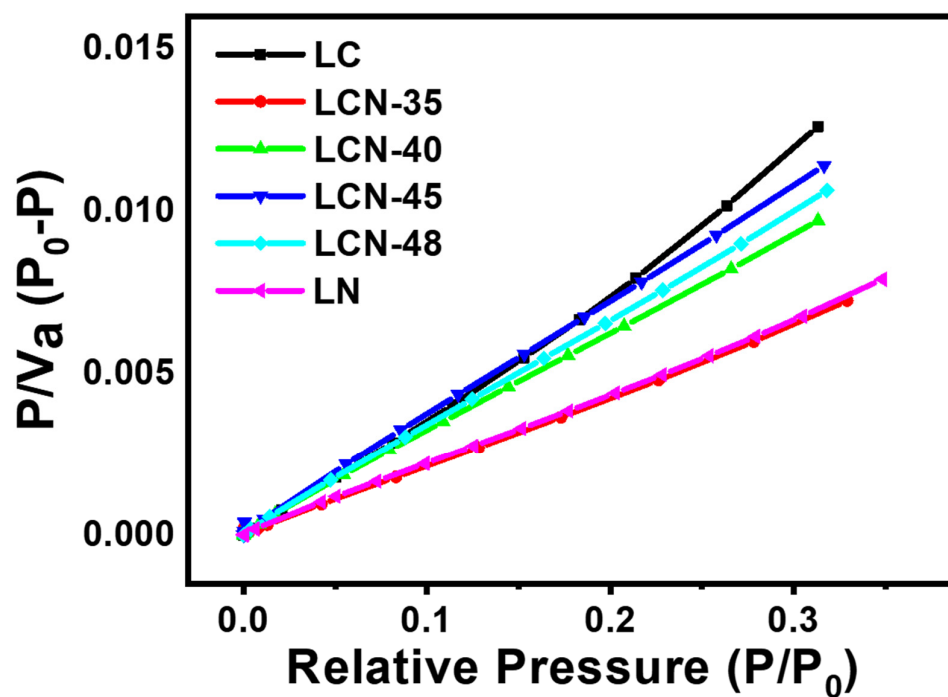

Figure S2. BET plots of LC, LCN series, and LN samples.

**Table S1.** Adsorption characteristics of LC, LCN series, and LN.

| Sample | BET<br>Surface Area ( $\text{m}^2 \text{g}^{-1}$ ) | Total pore Volume<br>( $\text{cm}^3 \text{g}^{-1}$ ) |
|--------|----------------------------------------------------|------------------------------------------------------|
| LC     | 124.71                                             | 0.19                                                 |
| LCN-35 | 209.89                                             | 0.11                                                 |
| LCN-40 | 142.98                                             | 0.07                                                 |
| LCN-45 | 122.91                                             | 0.06                                                 |
| LCN-48 | 133.34                                             | 0.07                                                 |
| LN     | 205.68                                             | 0.57                                                 |

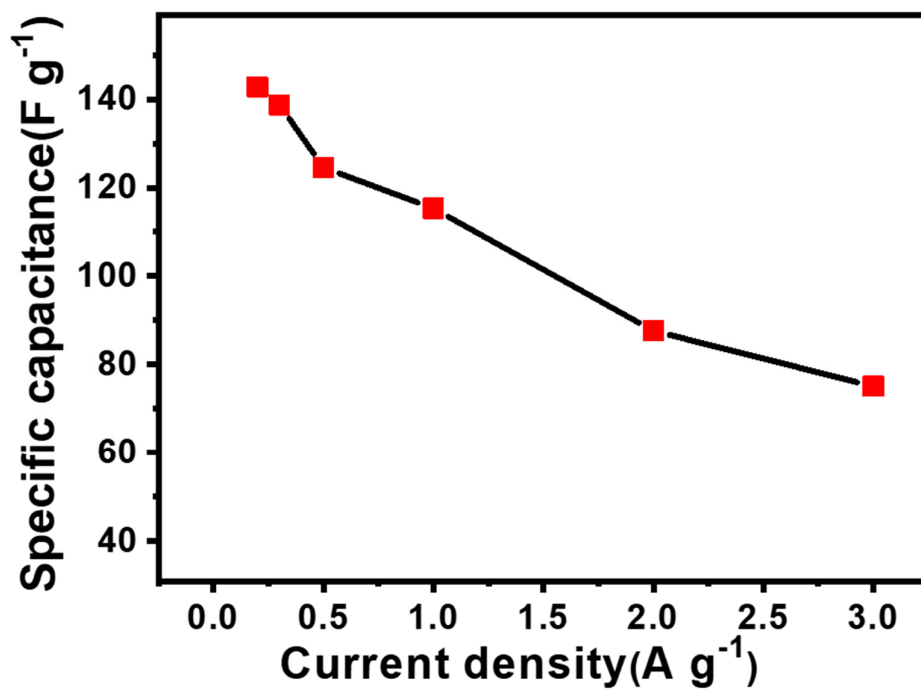

**Figure S3.** Specific capacitances of LCN-45 electrode calculated from Figure 6b.

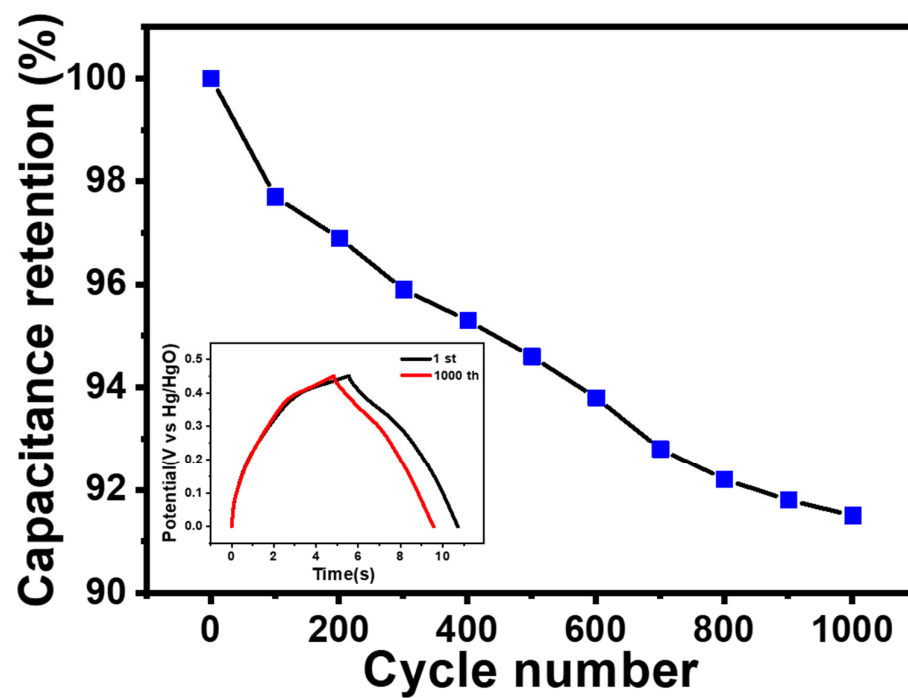

**Figure S4.** Cycle stability of LN electrode at 1.0 A g<sup>-1</sup> (Inset shows the GCD curves of the 1<sup>st</sup> and 1000<sup>th</sup> cycles).
